# 1 **SmProt: A Reliable Repository with Comprehensive Annotation**

## 2 **of Small Proteins Identified from Ribosome Profiling**

3

4 Yanyan Li<sup>1,2,#</sup>, Honghong Zhou<sup>2,#</sup>, Xiaomin Chen<sup>2,3,#</sup>, Yu Zheng<sup>1,2</sup>, Quan Kang<sup>2</sup>, Di  
5 Hao<sup>2</sup>, Lili Zhang<sup>2,3</sup>, Tingrui Song<sup>2</sup>, Huaxia Luo<sup>2</sup>, Yajing Hao<sup>4</sup>, Yiwen Chen<sup>5</sup>, Runsheng  
6 Chen<sup>2,3,6,\*</sup>, Peng Zhang<sup>2,\*</sup>, Shunmin He<sup>1,2,\*</sup>

7

8 <sup>1</sup> *College of Life Sciences, University of Chinese Academy of Sciences, Beijing 100049,*  
9 *China*

10 <sup>2</sup> *Key Laboratory of RNA Biology, Center for Big Data Research in Health, Institute of*  
11 *Biophysics, Chinese Academy of Sciences, Beijing 100101, China*

12 <sup>3</sup> *University of Chinese Academy of Sciences, Beijing 100049, China*

13 <sup>4</sup> *Department of Cellular and Molecular Medicine, University of California, San Diego,*  
14 *La Jolla, CA 92093, USA*

15 <sup>5</sup> *Department of Bioinformatics and Computational Biology, The University of Texas*  
16 *MD Anderson Cancer Center, Houston, TX 77030, USA*

17 <sup>6</sup> *Guangdong Geneway Decoding Bio-Tech Co. Ltd, Foshan, 528316, China.*

18

19 # Equal contribution.

20 \* Corresponding authors.

21 Email: [heshunmin@ibp.ac.cn](mailto:heshunmin@ibp.ac.cn) (He S), [zhangp@ibp.ac.cn](mailto:zhangp@ibp.ac.cn) (Zhang P), [crs@ibp.ac.cn](mailto:crs@ibp.ac.cn)  
22 (Chen R)

## Abstract

Small proteins specifically refer to proteins consisting of less than 100 amino acids translated from small open reading frames (sORFs), which were usually missed in previous genome annotation. The significance of small proteins has been revealed in current years, along with the discovery of their diverse functions. However, systematic annotation of small proteins is still insufficient. SmProt was specially developed to provide valuable information on small proteins for scientific community. Here we present the update of SmProt, which emphasizes reliability of translated sORFs, genetic variants in translated sORFs, disease-specific sORFs translation events or sequences, and significantly increased data volume. More components such as non-AUG translation initiation, function, and new sources are also included. SmProt incorporated 638,958 unique small proteins curated from 3,165,229 primary records, which were computationally predicted from 419 ribosome profiling (Ribo-seq) datasets and collected from the literature and other sources originating from 370 cell lines or tissues in 8 species (*Homo sapiens*, *Mus musculus*, *Rattus norvegicus*, *Drosophila melanogaster*, *Danio rerio*, *Saccharomyces cerevisiae*, *Caenorhabditis elegans*, and *Escherichia coli*). In addition, small protein families identified from human microbiomes were collected. All datasets in SmProt are free to access, and available for browse, search, and bulk downloads at <http://bigdata.ibp.ac.cn/SmProt/>.

**KEYWORDS:** Ribosome profiling; Small ORF; Upstream ORF; Variants; Disease

## Introduction

Genome annotation is fundamental to life science. In recent years, it has been found that small open reading frames (sORFs) widely exist in genomes of many organisms including human [1] and human microbiomes [2], and some are able to be translated into small proteins [3–5]. Small proteins are proteins with less than 100 amino acids, which may derive from untranslated regions (UTRs) of mRNAs [6] or non-coding RNAs [7,8] including pri-miRNAs [9,10], lncRNAs [11], and circRNAs [12]. Small proteins were usually missed in previous coding sequence annotation, while their significance has been revealed in current years for diverse functions [13], such as embryonic development [14,15], cell apoptosis [16], muscle contraction [17], and antimicrobial activity [18]. Some are proved to play roles in many diseases [19,20] including tumors [9,11,12]. Despite the abundance of sORFs in genome, the number of well-studied small proteins is very limited. Annotation of numerous small proteins will contribute to studies on various physiology and pathology processes.

Identification of small proteins at proteomic level is challenging. Mass spectrum (MS) can provide direct evidence of small proteins, but it relies much on the coverage of existing libraries, which mainly focused on large proteins rather than small proteins. Protease cleavage sites were lacking in small proteins limited by length. Besides, small proteins are usually of low abundance, and tend to be filtered out during enrichment process [21]. Ribosome profiling (also named Ribosomal footprinting or Ribo-Seq) provides a more sensitive way for global detection of translation events based on the deep sequencing of ribosome-protected mRNA fragments (RPFs) [22,23], which allows for identifying the location of translated ORFs and translation initiation sites, the distribution of ribosomes on mRNA, and the speed of translating ribosomes [24]. Reference library for mass spectrometry can also be constructed with Ribo-Seq results. The regular Ribo-seq (rRibo-seq) utilizes cycloheximide (CHX) [25], a drug binding at the ribosome E-site [26], as a translation elongation inhibitor to freeze translating ribosomes. Translation is principally regulated at the initiation stage. TI-seq is a

variation of rRibo-seq technique that use different translation inhibitors, usually lactomidomycin (LTM) [25] or harringtonine (HAR) [27], which can induce ribosomes stasis at translation initiation (TI) sites (TISs). TI-seq enables the global mapping of translation initiation sites, and is more accurate in prediction of non-AUG start codons. Many sORFs are proved to use non-classical AUG start codon [28], which is also an important mechanism for generating protein isoforms [29,30]. rRibo-seq data usually have clear triplet periodicity [26]. Different computational analysis strategies [31–38] have been developed to identify translated sequences using Ribo-seq data.

Emerging evidences showed that many upstream open reading frames (uORFs) act in cis to regulate the translation of downstream ORFs by leaky scanning [39], reinitiation [40], and ribosome stalling [41]. Recently, variants creating new upstream start codons or disrupting stop sites of existing uORFs (uORF-perturbing) were found under strong negative selection [42]. uORF-perturbing variants were demonstrated as an under-recognized functional class that contribute to human disease.

Since great importance has been attached to small proteins, in-depth investigations of small proteins across various species are in need. SmProt is dedicated to integrate knowledge of proteins shorter than 100 amino acids (hereinafter referred to as small proteins) translated from various sources, especially for ones from UTRs and non-coding RNAs. The annotation information and functional sections in the current release are much richer than those in the 1<sup>st</sup> release [43], and the data volume and reliability are greatly improved.

## **Data collection and processing**

### **Data sources**

rRibo-seq and TI-seq datasets derived from diverse tissues/cell lines were collected from GEO database [44] and European Nucleotide Archive [45]. The latest reference genomes and gene annotation were download from Ensembl [46] , GENCODE [47], and NCBI-Genome database. WGS Variants were collected from their respective

websites. The construction pipeline of SmProt was summarized as follows (**Figure 1**).

# **Ribo-seq data processing**

The fastq files of 547 Ribo-seq datasets were downloaded from GEO and European Nucleotide Archive database. Each dataset was checked manually to confirm the sequencing adapters. The adapters were removed using cutadapt 1.18 [48] and only reads with length 25–35 were kept. Then the sequences were mapped to the latest genome using STAR 2.5.2a [49] using EndToEnd mode with allowance of up to 2 mismatches.

Ribo-seq quality and P-site offsets were assessed by Ribo-TISH [34] quality module. For TI-seq data, more attention was put on TIS quality (-t). Manual checks were then carried out to verify offset values and eliminate datasets without obvious triplet periodicity. After the quality control, 419 Ribo-seq datasets (Supplementary Table S1) were kept.

Translated ORFs were predicted by Ribo-TISH predict module. Biological and technical duplication data under the same treatment in one dataset were merged. Minimum amino acid length of candidate ORF was set to 5. Considering both ATG and near-cognate start codons, rRibo-seq datasets using only CHX without matched TI-seq were analyzed twice. One is prediction of ORFs with canonical ATG start codon, the other is prediction of ORFs with near-cognate start codons with 1 base different from ATG (--alt). Preferring data evidence instead of prior assumption in our database, only the best frame test results from multiple candidate start codons in the same ORF were reported (--framebest). For datasets containing TI-seq data, alternative start codons were included (--alt), and different parameters were set for LTM-based TI-seq and HARR-based TI-seq (--harr).

sORFs with less than 100 amino acids were filtered from the above prediction results. To avoid confusion from classic proteins, those marked as *known* (means the translation initiation site is annotated in another transcript), *CDSFrameOverlap* (means the ORF overlaps with annotated CDS in another transcript in the same reading

frame), and *Truncated* (means the ORF is part of annotated CDS in the same transcript) without translation initiation evidence (i.e. none significant results identified from paired TI-seq datasets) were further removed, considering these results may be supported by RPFs from other classic proteins longer than 100 AAs.

In-frame reads of sORFs were counted and normalized by library sequencing depth (in-frame total reads count) and sORF length, a similar method with RPKM (Reads Per Kilobase per Million mapped reads) in RNA-seq but using ribosome profiling data which represents the translation levels.

Finally, 3,060,793 records were kept. Results with the identical genome loci in one species were merged as the same small protein generating 577,206 unique IDs, while information derived from multiple datasets were kept, a similar integration method to piRBase [50].

# **Variants from ribosome profiling data**

We performed germline variants detection on 96 human ribosome profiling datasets, referring to the workflow for processing RNA data for germline short variant discovery with GATK v4.1.8 [51–54]. Duplicate reads were identified using MarkDuplicates tool after alignment, then reads with N in Cigar were split using SplitNCigarReads tool. Base quality score recalibration was carried out based on true sites in training sets using BaseRecalibrator tool and applied using ApplyBQSR tool. Variants were called individually in each sample using the HaplotypeCaller tool. Variants with QualByDepth (QD) < 2 were removed using VariantFiltration tool. Germline single nucleotide variants (SNVs) were linked to small proteins in SmProt according to genomic positions.

# **Variants from WGS data**

Variants from 1KGP3 [55], GAsP [56], TOPMed [57], gnomAD3 [42,58], and NyuWa [59] were collected. VCF files were lifted over from old genome version to GRCh38 using LiftoverVcf tool of GATK with allowance to recover swapped ref and alt alleles.

155 Variants in 5'UTRs were evaluated for their effects on translated uORFs in SmProt  
156 using VEP [60] with plugin UTRannotator [42,61], and classified by their functional  
157 consequences.

### 158 **Disease-specific small proteins**

159 Small proteins identified only from diseased cell lines/tissues but not from  
160 corresponding normal cell lines/tissues were predicted as disease-specific translation  
161 events: if there were matched data of normal and diseased groups in the same dataset,  
162 small proteins derived uniquely from diseased group were screened as disease-specific  
163 ones; if there's no matched control group in the same dataset, the same type of healthy  
164 tissue/cell line in other datasets were used as control. If there's no matched same  
165 tissue/cell line, all data from diverse normal tissues/cell lines were merged for  
166 comparisons (Supplementary Table S2), and small proteins identified only from the  
167 diseased cell lines/tissues were predicted as tissue-specific. Disease-specific or tissue-  
168 specific translation events require RiboPvalue in disease groups under 0.01 while  
169 similar proteins with different TISs at the same loci in control group not detected  
170 (RiboPvalue higher than 0.05).

171 Single nucleotide variants (SNVs) detected only in diseased variant sets but not in  
172 normal sets were predicted as disease-specific SNVs. SNVs in diseased cell  
173 lines/tissues derived from ribosome profiling data and located within the genomic  
174 region of small proteins were regarded as diseased variant sets. SNVs in corresponding  
175 normal cell lines/tissues (Supplementary Table S2) derived from ribosome profiling  
176 data were combined with all variants derived from multiple WGS projects, as control  
177 variant sets for comparison.

### 178 **Function domain prediction**

179 Besides function of small proteins collected from literature mining, we used  
180 InterProScan [62] to predict function domain of small proteins, which focuses on  
181 combination of protein family membership and the functional domains/sites, and has  
182 been extensively used by genome sequencing projects and the UniProt Knowledgebase

[63]. Default thresholds and additional parameters *-goterms -pa* were adopted for gene oncology and pathway annotations.

## PhyloCSF calculation

Pre-calculated BigWig data of PhyloCSF [64] scores at each base across the whole genome were downloaded from the broad institute <https://data.broadinstitute.org/compbio1/PhyloCSFtracks/>, and the score for genomic region of each small protein was extracted with our script using pyBigWig (<https://github.com/deeptools/pyBigWig>).

## Database implementation

Database website was organized with HTML (<https://html.spec.whatwg.org/>), JavaScript (<https://www.javascript.com/>), PHP (<https://www.php.net/>), and MYSQL (<https://www.mysql.com/>). UCSC Genome Browser (<http://genome.ucsc.edu/>) was used to visualize the small proteins and variants. NCBI BLAST (<https://blast.ncbi.nlm.nih.gov/Blast.cgi>) was used for sequence similarity searches.

## Database content and usage

### Overview

SmProt was constructed by pipeline described in Figure 1. Multiple ways were provided to search, browse, visualize, and study small proteins (**Figure 2**). Small proteins were found mainly from rRibo-seq and TI-seq data. All information for small proteins from different data sources and datasets were integrated. General information for small proteins was provided such as sequence, mass, location, blocks, tissue or cell line, predicted functions, conservation, and multiple IDs including small protein ID, Ensembl ID, and NONCODE [65] ID. Translation level (in frame counts and Ribo RPKM) of small proteins identified from each dataset and record was provided. Details for their related variants and diseases were also provided (**Figure 3**). SmProt now has 638,958 unique small proteins and 3,165,229 small protein records in total (**Table 1**; Supplementary Table S3).



## **Reliability of small proteins**

SmProt emphasizes reliability of small proteins, which is guaranteed mainly by the significance of 3 nt periodicity in RPF P-site profile:

Firstly, we constructed new pipeline based on independently published toolkit Ribo-TISH [34], which allows for accurate detection of ORFs and TISs using rRibo-seq and TI-seq. Ribo-TISH uses rank sum test to detect 3 nt periodicity, and negative binomial test to detect translation initiation sites, which outperforms other established methods in prediction accuracy.

Secondly, in addition to the quality control based on Ribo-TISH quality module, manual checks were also carried out to ensure clear triplet periodicity and unambiguous offset of Ribo-seq data, which further eliminated noises.

Thirdly, we provided several evaluations as evidences: p-values of small proteins called from multiple ribosome profiling datasets indicating the confidence in different samples and conditions; PhyloCSF conservation of genomic regions reflecting coding potential; and peptide evidence derived from mass spectrum data. All evidences were exhibited in the small protein page. What's more, a set with evidence of both translation events and protein fragments was provided on download page.

What's more, information of small protein derived from multiple sources were integrated in small protein information page.

## **Variants related to small proteins**

25,475 variants located on translated sORFs were provided, which were exhibited in the related small protein page. For uORF-perturbing variants are likely to impact translation of downstream proteins [42], variants from multiple WGS projects and ribosome profiling data were evaluated for their effects on translated uORFs in SmProt, which can be found at variants page.

## **Disease-specific small proteins**

Disease-specific small proteins have potential to be candidates of molecular markers or targets for diagnosis and treatment. Disease-specific translation events as well as disease-specific SNVs of small proteins in 16 types of diseases were identified (see methods) (Supplementary Table S4). Besides, small proteins that have been verified experimentally in certain diseases were also documented through literature mining.

### **Human microbiomes small proteins**

Over 4000 conserved small protein families identified from human microbiomes were collected [2]. A new section *HumanMicroBio* was created to integrate and display selected information of these small protein families.

### **Other sources**

We use a set of keywords (Supplementary File S1) to search articles about small proteins in PubMed database. High-confidence small proteins in CCDS [66] and Swiss-Prot [67] were also integrated. Literature mining is processed in stages, and the newly published data from other sources is being released continuously after accomplishment of manual review and curation.

### **Function domain prediction**

For successfully predicted functions of small proteins derived from ribosome profiling and literature mining, SmProt provided graph for visualization and prediction details including gene ontology (GO) and pathway annotation. Users can choose *predicted functions* on *Browse* page to filter the results with function domain prediction.

### **Inner BLAST**

The abundant small proteins across multiple species allows for sequence similarity searches of both nucleotides and proteins. Users can search for sequences of interests using BLASTp and BLASTx (NCBI BLAST 2.2.24 release) online.

### **Visualization using UCSC Genome Browser**

SmProt incorporated UCSC Genome Browser [68] for visualization of all the

information including genomic loci of small proteins, variants from ribosome profiling data and multiple WGS projects related to small proteins, MS data, and gene annotation. The latest genome versions including hg38, mm10, rn6, dm6, ce11, sacCer3, and danRer11 were provided.

## Comparison with other databases

SmProt currently includes 419 Ribo-seq datasets derived from 116 cell lines/tissues, compared to 60 datasets derived from 37 cell lines/tissues in the initial version. The number of small protein records identified from ribosome profiling in the current release is 60 times that of the 1<sup>st</sup> release (3 million to 0.05 million). The current release of SmProt combined a large amount of duplicate records in 1<sup>st</sup> release [43], and Ribo-seq analysis pipeline was optimized to ensure the reliability of our results. Variants in translated sORFs identified from Ribo-seq data as well as uORF-perturbing variants identified from WGS projects were provided. Disease-specific small proteins may provide new perspectives for clinical studies.

Currently, there are a few databases for small proteins such as ARA-PEPs [69], PsORF [70], and sORFs.org [71]. ARA-PEPs and PsORF only harbors small proteins in plants. sORFs.org developed simple inner TIS-calling algorithm not based on triplet periodicity, which should be the most important feature of Ribo-seq. SmProt emphasizes high confidence using our Ribo-TISH pipeline that is more accurate than previous methods. SmProt analyzed 419 Ribo-seq datasets, while there were only 78 in sORFs.org. SmProt pays special attention to function, variants, and related diseases of small proteins, and WGS data resource are also integrated, which other databases didn't pay attention to.

Other proteomic databases such as UniProt, neXtProt [72], and OpenProt [73] are not specifically designed for small proteins. neXtProt only harbors proteins of human while SmProt harbors small proteins in 8 species. OpenProt also used ribosome profiling and mass spectrum to predict proteins including some small proteins longer than 30 amino acids, while SmProt analyzed much more ribosome profiling datasets

(419), which were about 5 times that in OpenProt (87), and provided small proteins longer than 5 amino acids.

## Conclusion

In brief, SmProt integrated small proteins from large amount of ribosome profiling data, and provides more abundant details. We strongly believe that SmProt will provide valuable and accurate information on small proteins for scientific community. Moreover, it provides a new resource for users interested in function and mechanism study, and a reference for construction of mass spectrometry library of small proteins.

## Data Availability

SmProt is publicly available at <http://bigdata.ibp.ac.cn/SmProt/>.

## CRediT author statement

**Yanyan Li:** Conceptualization, Methodology, Investigation, Formal analysis, Data Curation, Writing - Original Draft, Software, Visualization. **Honghong Zhou:** Investigation, Data Curation, Funding acquisition. **Xiaomin Chen:** Investigation, Data Curation. **Yu Zheng:** Data Curation, Software, Visualization. **Quan Kang:** Software, Visualization. **Di Hao:** Data Curation, Software. **Lili Zhang:** Visualization. **Tingrui Song:** Visualization. **Huaxia Luo:** Writing - Review & Editing. **Yajing Hao:** Writing - Review & Editing. **Yiwen Chen:** Software. **Runsheng Chen:** Resources, Supervision, Funding acquisition. **Peng Zhang:** Conceptualization, Methodology, Investigation, Software, Writing - Review & Editing, Visualization, Project administration, Funding acquisition. **Shunmin He:** Conceptualization, Methodology, Resources, Investigation, Writing - Review & Editing, Supervision, Funding acquisition.

## Competing interests

The authors have declared no competing interests.

## Acknowledgments

This work was supported by National Natural Science Foundation of China (Grant Nos. 81902519, 31871294, 31701117, and 31970647); the National Key R&D Program of China (Grant Nos. 2016YFC0901702 and 2018YFA0106901); the Strategic Priority Research Program of Chinese Academy of Sciences (Grant No. XDB38040300); the 13th Five-year Informatization Plan of Chinese Academy of Sciences (Grant No. XXH13505-05); special investigation on science and technology basic resources of the MOST, China (Grant No. 2019FY100102); the National Genomics Data Center. We thank Center for Big Data Research in Health (<http://bigdata.ibp.ac.cn/>), Institute of Biophysics, Chinese Academy of Sciences, for supporting data analysis and computing resource.

## References

- [1] Basrai MA, Hieter P, Boeke JD. Small open reading frames: beautiful needles in the haystack. *Genome Res* 1997;7:768–71.
- [2] Sberro H, Fremin BJ, Zlitni S, Edfors F, Greenfield N, Snyder MP, et al. Large-scale analyses of human microbiomes reveal thousands of small, novel genes. *Cell* 2019;178:1–15.
- [3] Bazzini AA, Johnstone TG, Christiano R, Mackowiak SD, Obermayer B, Fleming ES, et al. Identification of small ORFs in vertebrates using ribosome footprinting and evolutionary conservation. *EMBO J* 2014;33:981–93.
- [4] Smith JE, Alvarez-Dominguez JR, Kline N, Huynh NJ, Geisler S, Hu W, et al. Translation of small open reading frames within unannotated RNA transcripts in *Saccharomyces cerevisiae*. *Cell Rep* 2014;7:1858–66.
- [5] van Heesch S, Witte F, Schneider-Lunitz V, Schulz JF, Adami E, Faber AB, et al. The translational landscape of the human heart. *Cell* 2019;178:242–60.e29.
- [6] Calvo SE, Pagliarini DJ, Mootha VK. Upstream open reading frames cause widespread reduction of protein expression and are polymorphic among humans. *Proc Natl Acad Sci U S A* 2009;106:7507–12.

- 343 [7] Zhu S, Wang J, He Y, Meng N, Yan GR. Peptides/Proteins encoded by non-coding  
344 RNA: a novel resource bank for drug targets and biomarkers. *Front Pharmacol*  
345 2018;9:1295.
- 346 [8] Li LJ, Leng RX, Fan YG, Pan HF, Ye DQ. Translation of noncoding RNAs: focus  
347 on lncRNAs, pri-miRNAs, and circRNAs. *Exp Cell Res* 2017;361:1–8.
- 348 [9] Fang J, Morsalin S, Rao V, Reddy ES. Decoding of non-coding DNA and non-  
349 coding RNA: pri-micro RNA-encoded novel peptides regulate migration of cancer cells.  
350 *J Pharm Sci* 2017;3:23–7.
- 351 [10] Razooky BS, Obermayer B, O'May JB, Tarakhovsky A. Viral infection identifies  
352 micropeptides differentially regulated in smORF-containing lncRNAs. *Genes (Basel)*  
353 2017;8:206.
- 354 [11] Huang JZ, Chen M, Chen, Gao XC, Zhu S, Huang H, et al. A peptide encoded by  
355 a putative lncRNA HOXB-AS3 suppresses colon cancer growth. *Mol Cell*  
356 2017;68:171–84.e6.
- 357 [12] Zhang M, Zhao K, Xu X, Yang Y, Yan S, Wei P, et al. A peptide encoded by circular  
358 form of LINC-PINT suppresses oncogenic transcriptional elongation in glioblastoma.  
359 *Nat Commun* 2018;9:4475.
- 360 [13] Couso JP, Patraquim P. Classification and function of small open reading frames.  
361 *Nat Rev Mol Cell Biol* 2017;18:575–89.
- 362 [14] Freyer L, Hsu CW, Nowotschin S, Pauli A, Ishida J, Kuba K, et al. Loss of Apela  
363 peptide in mice causes low penetrance embryonic lethality and defects in early  
364 mesodermal derivatives. *Cell Rep* 2017;20:2116–30.
- 365 [15] Galindo MI, Pueyo JI, Fouix S, Bishop SA, Couso JP. Peptides encoded by short  
366 ORFs control development and define a new eukaryotic gene family. *PLoS Biol*  
367 2007;5:e106.
- 368 [16] Guo B, Zhai D, Cabezas E, Welsh K, Nouraini S, Satterthwait AC, et al. Humanin  
369 peptide suppresses apoptosis by interfering with Bax activation. *Nature*  
370 2003;423:456–61.
- 371 [17] Anderson DM, Anderson KM, Chang CL, Makarewich CA, Nelson BR, McAnally

372 JR, et al. A micropeptide encoded by a putative long noncoding RNA regulates muscle  
373 performance. *Cell* 2015;160:595–606.

374 [18] Knappe D, Goldbach T, Hatfield MP, Palermo NY, Weinert S, Strater N, et al.  
375 Proline-rich antimicrobial peptides optimized for binding to *Escherichia coli* chaperone  
376 DnaK. *Protein Pept Lett* 2016;23:1061–71.

377 [19] Yaran W, Yang L, Yiming X, Yiwei Z, Rui H, Kaibo W, et al. Loss-of-function  
378 mutations of an inhibitory upstream ORF in the human hairless transcript cause Marie  
379 Unna hereditary hypotrichosis. *Nature Genetics* 2009;41:228–33.

380 [20] Cheng W, Wang S, Mestre AA, Fu C, Makarem A, Xian F, et al. C9ORF72  
381 GGGGCC repeat-associated non-AUG translation is upregulated by stress through  
382 eIF2alpha phosphorylation. *Nat Commun* 2018;9:51.

383 [21] Hsu PY, Benfey PN. Small but mighty: functional peptides encoded by small ORFs  
384 in plants. *Proteomics* 2018;18:e1700038.

385 [22] Ingolia NT, Ghaemmighami S, Newman JR, Weissman JS. Genome-wide analysis  
386 in vivo of translation with nucleotide resolution using ribosome profiling. *Science*  
387 2009;324:218–23.

388 [23] Ingolia NT, Lareau LF, Weissman JS. Ribosome profiling of mouse embryonic  
389 stem cells reveals the complexity and dynamics of mammalian proteomes. *Cell*  
390 2011;147:789–802.

391 [24] Weiss RB, Atkins JF. Translation goes global. *Science* 2011;334:1509–10.

392 [25] Schneider-Poetsch T, Ju J, Eyler DE, Dang Y, Bhat S, Merrick WC, et al. Inhibition  
393 of eukaryotic translation elongation by cycloheximide and lactimidomycin. *Nat Chem*  
394 *Biol* 2010;6:209–17.

395 [26] Calviello L, Ohler U. beyond read-counts: Ribo-seq data analysis to understand  
396 the functions of the transcriptome. *Trends in Genetics* 2017;33:728–44.

397 [27] Ingolia NT, Brar GA, Rouskin S, McGeachy AM, Weissman JS. The ribosome  
398 profiling strategy for monitoring translation in vivo by deep sequencing of ribosome-  
399 protected mRNA fragments. *Nat Protoc* 2012;7:1534–50.

400 [28] Lee S, Liu B, Lee S, Huang S-X, Shen B, Qian S-B. Global mapping of translation



401 initiation sites in mammalian cells at single-nucleotide resolution. *Proc Natl Acad Sci*  
402 U S A 2012;109:E2424–E32.

403 [29] Kochetov AV, Sarai A, Rogozin IB, Shumny VK, Kolchanov NA. The role of  
404 alternative translation start sites in the generation of human protein diversity. *Mol Genet*  
405 *Genomics* 2005;273:491–6.

406 [30] Oyama M, Kozuka-Hata H, Suzuki Y, Semba K, Yamamoto T, Sugano S. Diversity  
407 of translation start sites may define increased complexity of the human short ORFeome.  
408 *Mol Cell Proteomics* 2007;6:1000–6.

409 [31] Calviello L, Mukherjee N, Wyler E, Zauber H, Hirsekorn A, Selbach M, et al.  
410 Detecting actively translated open reading frames in ribosome profiling data. *Nat*  
411 *Methods* 2016;13:165–70.

412 [32] Fields AP, Rodriguez EH, Jovanovic M, Stern-Ginossar N, Haas BJ, Mertins P, et  
413 al. A regression-based analysis of ribosome-profiling data reveals a conserved  
414 complexity to mammalian translation. *Mol Cell* 2015;60:816–27.

415 [33] Ji Z, Song R, Regev A, Struhl K. Many lncRNAs, 5'UTRs, and pseudogenes are  
416 translated and some are likely to express functional proteins. *Elife* 2015;4:e08890.

417 [34] Zhang P, He D, Xu Y, Hou J, Pan BF, Wang Y, et al. Genome-wide identification  
418 and differential analysis of translational initiation. *Nat Commun* 2017;8:1749.

419 [35] Malone B, Atanassov I, Aeschimann F, Li X, Grosshans H, Dieterich C. Bayesian  
420 prediction of RNA translation from ribosome profiling. *Nucleic Acids Res*  
421 2017;45:2960–72.

422 [36] Raj A, Wang SH, Shim H, Harpak A, Li YI, Engelmann B, et al. Thousands of  
423 novel translated open reading frames in humans inferred by ribosome footprint  
424 profiling. *Elife* 2016;5.

425 [37] Chun SY, Rodriguez CM, Todd PK, Mills RE. SPECTre: a spectral coherence--  
426 based classifier of actively translated transcripts from ribosome profiling sequence data.  
427 *BMC Bioinformatics* 2016;17:482.

428 [38] Crappe J, Ndah E, Koch A, Steyaert S, Gawron D, De Keulenaer S, et al.  
429 PROTEOFORMER: deep proteome coverage through ribosome profiling and MS



430 integration. *Nucleic Acids Res* 2015;43:e29.

431 [39] Wang XQ, Rothnagel JA. 5'-untranslated regions with multiple upstream AUG  
432 codons can support low-level translation via leaky scanning and reinitiation. *Nucleic*  
433 *Acids Res* 2004;32:1382–91.

434 [40] Gunisova S, Valasek LS. Fail-safe mechanism of GCN4 translational control--  
435 uORF2 promotes reinitiation by analogous mechanism to uORF1 and thus secures its  
436 key role in GCN4 expression. *Nucleic Acids Res* 2014;42:5880–93.

437 [41] Ishimura R, Nagy G, Dotu I, Zhou H, Yang XL, Schimmel P, et al. Ribosome  
438 stalling induced by mutation of a CNS-specific tRNA causes neurodegeneration.  
439 *Science* 2014;345:455–9.

440 [42] Whiffin N, Karczewski KJ, Zhang X, Chothani S, Smith MJ, Evans DG, et al.  
441 Characterising the loss-of-function impact of 5' untranslated region variants in 15,708  
442 individuals. *Nat Commun* 2020;11:2523.

443 [43] Hao Y, Zhang L, Niu Y, Cai T, Luo J, He S, et al. SmProt: a database of small  
444 proteins encoded by annotated coding and non-coding RNA loci. *Brief Bioinform*  
445 2018;19:636–43.

446 [44] Barrett T, Wilhite SE, Ledoux P, Evangelista C, Kim IF, Tomashevsky M, et al.  
447 NCBI GEO: archive for functional genomics data sets--update. *Nucleic Acids Res*  
448 2013;41:D991–5.

449 [45] Silvester N, Alako B, Amid C, Cerdeno-Tarraga A, Clarke L, Cleland I, et al. The  
450 European Nucleotide Archive in 2017. *Nucleic Acids Res* 2018;46:D36–D40.

451 [46] Zerbino DR, Achuthan P, Akanni W, Amode MR, Barrell D, Bhai J, et al. Ensembl  
452 2018. *Nucleic Acids Res* 2018;46:D754–D61.

453 [47] Frankish A, Diekhans M, Ferreira AM, Johnson R, Jungreis I, Loveland J, et al.  
454 GENCODE reference annotation for the human and mouse genomes. *Nucleic Acids*  
455 *Res* 2019;47:D766–D73.

456 [48] Martin M. Cutadapt removes adapter sequences from high-throughput sequencing  
457 reads. 2011 2011;17:3.

458 [49] Dobin A, Davis CA, Schlesinger F, Drenkow J, Zaleski C, Jha S, et al. STAR:

459 ultrafast universal RNA-seq aligner. *Bioinformatics* 2013;29:15–21.

460 [50] Wang J, Zhang P, Lu Y, Li Y, Zheng Y, Kan Y, et al. piRBase: a comprehensive  
461 database of piRNA sequences. *Nucleic Acids Res* 2019;47:D175–D80.

462 [51] Poplin R, Ruano-Rubio V, DePristo MA, Fennell TJ, Carneiro MO, Van der  
463 Auwera GA, et al. Scaling accurate genetic variant discovery to tens of thousands of  
464 samples. *bioRxiv* 2018:201178.

465 [52] Van der Auwera GA, Carneiro MO, Hartl C, Poplin R, Del Angel G, Levy-  
466 Moonshine A, et al. From FastQ data to high confidence variant calls: the Genome  
467 Analysis Toolkit best practices pipeline. *Curr Protoc Bioinformatics* 2013;43:1101–33.

468 [53] DePristo MA, Banks E, Poplin R, Garimella KV, Maguire JR, Hartl C, et al. A  
469 framework for variation discovery and genotyping using next-generation DNA  
470 sequencing data. *Nat Genet* 2011;43:491–8.

471 [54] McKenna A, Hanna M, Banks E, Sivachenko A, Cibulskis K, Kernysky A, et al.  
472 The Genome Analysis Toolkit: a MapReduce framework for analyzing next-generation  
473 DNA sequencing data. *Genome Res* 2010;20:1297–303.

474 [55] Sudmant PH, Rausch T, Gardner EJ, Handsaker RE, Abyzov A, Huddleston J, et  
475 al. An integrated map of structural variation in 2,504 human genomes. *Nature*  
476 2015;526:75–81.

477 [56] Consortium GK. The GenomeAsia 100K Project enables genetic discoveries  
478 across Asia. *Nature* 2019;576:106–11.

479 [57] Taliun D, Harris DN, Kessler MD, Carlson J, Szpiech ZA, Torres R, et al.  
480 Sequencing of 53,831 diverse genomes from the NHLBI TOPMed Program. *Nature*  
481 2021;590:290–9.

482 [58] Karczewski KJ, Francioli LC, Tiao G, Cummings BB, Alfoldi J, Wang Q, et al.  
483 The mutational constraint spectrum quantified from variation in 141,456 humans.  
484 *Nature* 2020;581:434–43.

485 [59] Zhang P, Luo H, Li Y, Wang Y, Wang J, Zheng Y, et al. NyuWa genome resource:  
486 deep whole genome sequencing based Chinese population variation profile and  
487 reference panel. *bioRxiv* 2020:2020.11.10.376574.

488 [60] McLaren W, Gil L, Hunt SE, Riat HS, Ritchie GR, Thormann A, et al. The Ensembl  
489 Variant Effect Predictor. *Genome Biol* 2016;17:122.

490 [61] Zhang X, Wakeling M, Ware J, Whiffin N. Annotating high-impact 5'untranslated  
491 region variants with the UTRannotator. *Bioinformatics* 2020;14:btaa783.

492 [62] Jones P, Binns D, Chang HY, Fraser M, Li W, McAnulla C, et al. InterProScan 5:  
493 genome-scale protein function classification. *Bioinformatics* 2014;30:1236–40.

494 [63] Consortium U. UniProt: a hub for protein information. *Nucleic Acids Res*  
495 2015;43:D204–12.

496 [64] Lin MF, Jungreis I, Kellis M. PhyloCSF: a comparative genomics method to  
497 distinguish protein coding and non-coding regions. *Bioinformatics* 2011;27:i275–82.

498 [65] He S, Liu C, Skogerbo G, Zhao H, Wang J, Liu T, et al. NONCODE v2.0: decoding  
499 the non-coding. *Nucleic Acids Res* 2008;36:D170–2.

500 [66] Pujar S, O'Leary NA, Farrell CM, Loveland JE, Mudge JM, Wallin C, et al.  
501 Consensus coding sequence (CCDS) database: a standardized set of human and mouse  
502 protein-coding regions supported by expert curation. *Nucleic Acids Res*  
503 2018;46:D221–D8.

504 [67] Consortium U. UniProt: a worldwide hub of protein knowledge. *Nucleic Acids Res*  
505 2019;47:D506–D15.

506 [68] Haeussler M, Zweig AS, Tyner C, Speir ML, Rosenbloom KR, Raney BJ, et al.  
507 The UCSC Genome Browser database: 2019 update. *Nucleic Acids Res*  
508 2019;47:D853–D8.

509 [69] Hazarika RR, De Coninck B, Yamamoto LR, Martin LR, Cammue BP, van Noort  
510 V. ARA-PEPs: a repository of putative sORF-encoded peptides in *Arabidopsis thaliana*.  
511 *BMC Bioinformatics* 2017;18:37.

512 [70] Chen Y, Li D, Fan W, Zheng X, Zhou Y, Ye H, et al. PsORF: a database of small  
513 ORFs in plants. *Plant Biotechnol J* 2020;18:2158–60.

514 [71] Olexiouk V, Van Criekinge W, Menschaert G. An update on sORFs.org: a  
515 repository of small ORFs identified by ribosome profiling. *Nucleic Acids Res*  
516 2018;46:D497–D502.

[72] Gaudet P, Michel PA, Zahn-Zabal M, Britan A, Cusin I, Domagalski M, et al. The neXtProt knowledgebase on human proteins: 2017 update. *Nucleic Acids Res* 2017;45:D177–D82.

[73] Brunet MA, Brunelle M, Lucier JF, Delcourt V, Levesque M, Grenier F, et al. OpenProt: a more comprehensive guide to explore eukaryotic coding potential and proteomes. *Nucleic Acids Res* 2019;47:D403–D10.

## Figure legends

### Figure 1 Construction pipeline of SmProt

Blue background: data sources. Yellow background: management processes. Red background: results. Abbreviations: WGS, whole genome sequencing; MS, mass spectrometry; TIS, translation initiation site; ORF, open reading frame; sORF, small open reading frame; uORF, upstream open reading frame.

### Figure 2 Usage of SmProt

SmProt provided multiple ways to search, browse, visualize small proteins, related diseases, and variants. Abbreviations: WGS, whole genome sequencing; ORF, open reading frame.

### Figure 3 Contents of SmProt

Detailed information for small proteins, including general annotation, information from ribosome profiling data, literature, other databases, mass spectrometry, function domain prediction, related diseases, related variants from WGS projects as well as corresponding effects, etc. Abbreviations: WGS, whole genome sequencing; TIS, translation initiation site.

## Tables

### Table 1 Statistics of unique small proteins in SmProt

## Supplementary material

545 **Supplementary Table S1: Information of ribosome profiling datasets analyzed in**  
546 **SmProt (.xlsx)**

547 **Supplementary Table S2: Dataset contrasts for generating disease-specific small**  
548 **proteins and variants (.xlsx)**

549 **Supplementary Table S3: Statistics of small proteins primary records in SmProt**  
550 **(.xlsx)**

551 **Supplementary Table S4: Statistics of small proteins and variants specific in**  
552 **diverse diseases (.xlsx)**

553 **Supplementary File S1: Keywords for literature mining (.doc)**

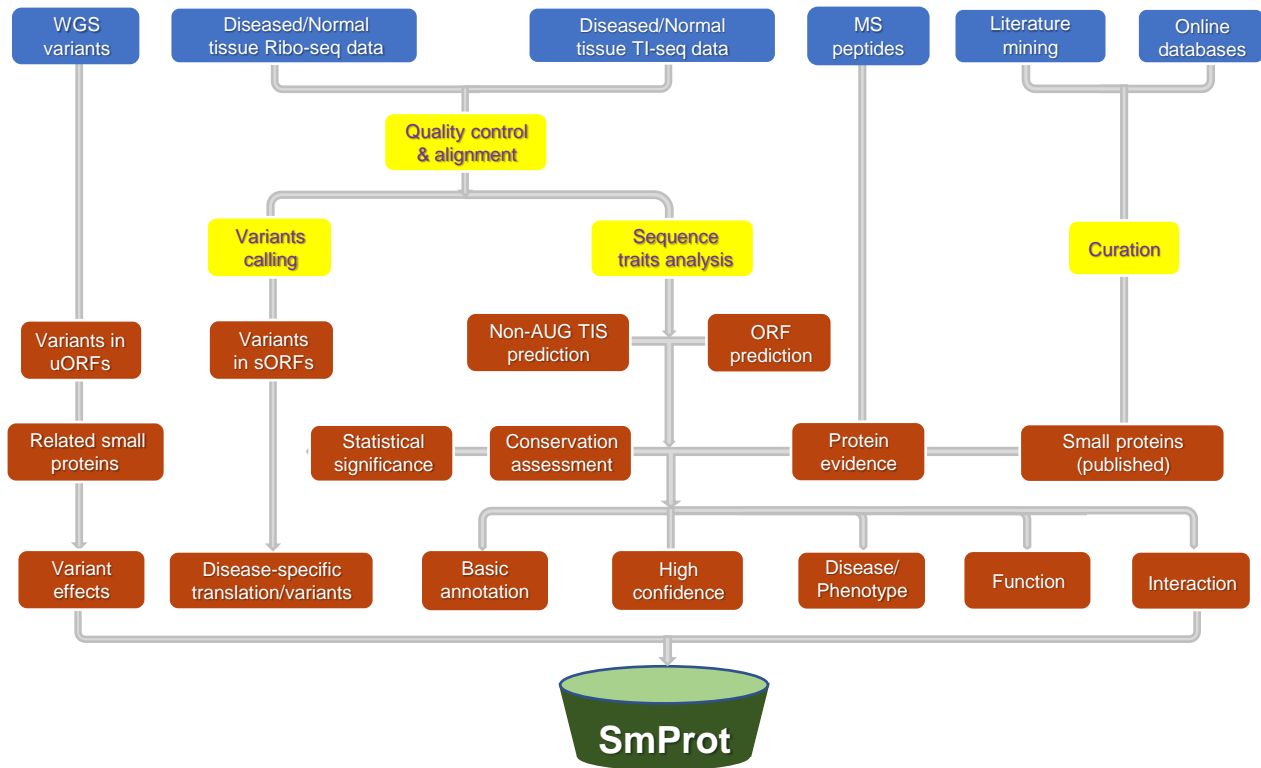

## Search small proteins

**ID Search**

**Choose species and ID type**

Species:  small protein ID:

Example: SmProt ID: SPROHSA197474 ENSEMBL gene ID: ENSG00000227877 Gene Symbol: FGF7P3 NONCODE gene ID: NONMEG000001

**Location Search**

**Search small proteins overlapping with the location**

Species:  Chromosome:  Start location:  Stop location:

Example: Chromosome: chr10 Start location: 61034338 Stop location: 61959438

**Search similar protein sequences using BLAST**

Sequence Search: go to [BLAST](#) module

## Browse small proteins by related diseases

**disease:**

**Detected:**  **Start Codon:**

**Result f**

**SPROHS:** Marie Unna hereditary hypotrichosis (MUHH) melanoma

**SPROHS:** neuroblastoma non-small-cell lung carcinoma osteosarcoma

**SPROHSA139826** acute myeloid leukemia

**Detected**  **Start Codon**

**Detected**  **Start Codon**

**Detected**  **Start Codon**

## Browse variants related to small/upstream ORFs

**Variant Type:**  **Data Source:**

**Select variants effect on upstream ORFs**

**Select variants detected in WGS project or Ribo-seq datasets**

**Result for Variants: All Ribosome profiling**

**Display**  items per page

**Page**  Total Page: 1274 Total amount: 25475

| Variant         | Effect         | Gene  | Distance to CDS | Variant Type | Clinvar |
|-----------------|----------------|-------|-----------------|--------------|---------|
| 9-76394190-A-C  | CDS_elongated  | RFK   | 21              | uAUG_gained  | -       |
| 19-43934947-T-G | uORF_elongated | ZNF45 |                 | uSTOP_lost   | -       |

## Visualize small proteins and variants in genome browser

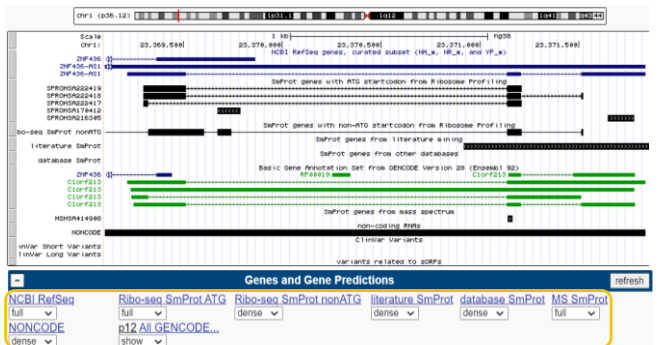

Users can manually change tracks to show or hide

General annotation of small protein

| General Information    |                                                                                            |
|------------------------|--------------------------------------------------------------------------------------------|
| Small Protein ID       | SPROHSA193481                                                                              |
| Organism               | human (Homo sapiens)                                                                       |
| Small Protein Sequence | MATRSGGTLVLVLGSGEMTTVPLLHAAREVDKGVFRYCTWPVIAISLASKSVNVKPLVTHRFLEKALEAFETTFKGLGKMLKCPDSQDNP |
| RNA Sequence           | ATGGCCACCTGCTGCTGGTGGGACCTCTGCTCTGGGGCTGGGCTCTGAGATGACCAACCGTACCCCTACTGCATGCAAGCATCCGGGAG  |
| Length                 | 96                                                                                         |
| Start Codon            | ATG                                                                                        |
| Location               | chr15:44827055-44830239                                                                    |
| Blocks                 | 44827055-44827221 44828449-44828571 44830236-44830239                                      |
| Mean PhyloCSF          | -2.35629554385                                                                             |
| Data Source            | Ribosome profiling, Literature,                                                            |
| Related Genes          | ENSG00000259479; SORD2P; ENSG00000259187; AC122108.1; NONHSA016753.NONHSA016754.           |
| Mass (Da)              | mono: 10478.6, avg: 10485.3                                                                |

Information from other sources

| Mass Spectrometry Information |                           |        |       |          |          |        |
|-------------------------------|---------------------------|--------|-------|----------|----------|--------|
| MSID                          | Seq                       | Length | Chr   | Start    | Stop     | Strand |
| MSH5AA15549                   | SGGTLLVLVLGSGEMTTVPLLHAAR | 25     | chr15 | 44828488 | 44828562 | -      |

Function domain prediction

Protein family membership

▣ Ribosomal protein S9 (SPR080794)

Homologous superfamilies

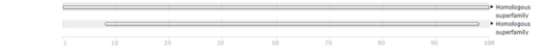

Domains and repeats

None predicted.

Detailed signature matches

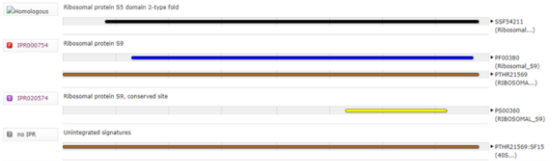

GO term prediction

Biological Process

# GO:0006412 translation

Molecular Function

# GO:0003735 structural constituent of ribosome

Detailed information of the small protein in each dataset

| Ribosome profiling |                                  |                            |                                    |         |            |               |            |
|--------------------|----------------------------------|----------------------------|------------------------------------|---------|------------|---------------|------------|
| RiboID             | TransID                          | Symbol                     | GeneType                           | TISType | RiboPvalue | InFrameCounts | RiboRPKM   |
| SRR5512738         | ENST00000564140.5                | SORD2P                     | transcribed_unprocessed_pseudogene | Novel   | 0.000201   | 38            | 16.5540125 |
| GSE45833_2         | ENST00000564140.5                | SORD2P                     | transcribed_unprocessed_pseudogene | Novel   | 0.000363   | 16            | 7.55027726 |
| SRR4045276_alt     | ENST00000564140.5                | SORD2P                     | transcribed_unprocessed_pseudogene | Novel   | 2.541e-12  | 76            | 61.8553950 |
| SRR3208921         | ENST00000564140.5                | SORD2P                     | transcribed_unprocessed_pseudogene | Novel   | 0.000205   | 15            | 11.4579517 |
| Min Ribo Pvalue    |                                  | 7.903e-24                  |                                    |         |            |               |            |
| Min TIS Pvalue     |                                  | None                       |                                    |         |            |               |            |
| RiboID             | CellOrTissue                     | Phenotype                  | RiboSource                         |         | PMID       |               |            |
| SRR5512738         | GM19147-Lymphoblastoid Cell Line | WT                         | GSM2601312                         |         | 29950183;  |               |            |
| GSE45833_2         | BJ cells                         | Quiescence                 | GSM1047586;GSM1047587              |         | 23594524;  |               |            |
| SRR4045276_alt     | Meg01 cells                      | WT                         | GSM2285909                         |         | 27681415;  |               |            |
| SRR3208921         | ES cell-derived neurons TSC2-/-  | Tuberous sclerosis complex | GSM2082573                         |         | 27655340;  |               |            |

Related Small Proteins with Different TISs

| Related Small Proteins with Different TISs |                      |             |        |                   |
|--------------------------------------------|----------------------|-------------|--------|-------------------|
| ID                                         | Small Protein Length | Start Codon | Strand | Blocks            |
| SPROHSA117403                              | 12                   | ATC         | +      | 45073491-45073530 |
| SPROHSA387281                              | 16                   | TTG         | -      | 44827055-44827106 |
| SPROHSA34778                               | 18                   | AAG         | -      | 44827055-44827112 |
| SPROHSA34779                               | 18                   | AAG         | +      | 45073473-45073530 |

Variants on RNA sequence of the small protein

| Related Variants |                       |      |            |
|------------------|-----------------------|------|------------|
| VarID            | Consequence To sORF   | rsID | RiboID     |
| 12-96334805-G-A  | Non-Synonymous p.T11I | -    | SRR3208921 |

Sources and effects of variants

| Data sources                                            |              |                  | 5'UTR Effect            |               |
|---------------------------------------------------------|--------------|------------------|-------------------------|---------------|
| Source                                                  | Allele Count | Allele Frequency | Variant Type            | uAUG_gained   |
| gnomAD3                                                 | 143170       | 0.008730         | Gene                    | RFK           |
| 1KGp3                                                   | 5005         | 0.999401         | Context                 | GGGAATG       |
| TOPMed                                                  | 125408       | 0.998726         | Kozak Sequence          | CCCAATG       |
| GAfP                                                    | 3474         | 0.999            | Kozak Strength          | weak          |
| NyuWa                                                   | 5998         | 1.0              | Effect                  | CD5_elongated |
| SRR2818787;SRR2818791;SRR3208885;SRR3208921;SRR3317843; |              |                  | Distance to CDS         | 21            |
|                                                         |              |                  | Distance to Inframe Met | NA            |
|                                                         |              |                  | Distance to Alt Stop    | -             |



**Table 1 Statistics of unique small proteins in SmProt**

| Type       | Start codon | Human   | Mouse   | Fruit fly | Rat    | C.elegans | Yeast  | E.coli | Zebrafish | All     |
|------------|-------------|---------|---------|-----------|--------|-----------|--------|--------|-----------|---------|
| Ribo-seq   | ATG         | 70,931  | 48,909  | 5269      | 3560   | 4334      | 4535   | 1881   | 1924      | 141,343 |
|            | Near ATG    | 229,653 | 133,037 | 29,679    | 9910   | 9894      | 12,339 | 10,004 | 1347      | 435,863 |
| Literature | All         | 38,157  | 8875    | 22,228    | 163    | 4         | 355    | 296    | 3612      | 73,690  |
| Databases  | All         | 786     | 797     | 100       | 271    | 120       | 336    | 955    | 64        | 3429    |
| MS         | All         | 768     | 51      | 66        | 38     | 0         | 3      | 0      | 1         | 927     |
| All IDs    | All         | 327,995 | 189,433 | 56,574    | 13,829 | 14,255    | 17,312 | 12,881 | 6679      | 638,958 |

*Note:* Not including human microbiomes small protein families. IDs mean unique entries with identical genome loci in one species. Abbreviations: Ribo-seq, ribosome profiling; MS, mass spectrometry.
